# Supplementary material for: MicroRNA-146a-5p Negatively Regulates Pro-Inflammatory Cytokine Secretion and Cell Activation in Lipopolysaccharide Stimulated Human Hepatic Stellate Cells through Inhibition of Toll-Like Receptor 4 Signaling Pathways
Source: MDPI journal article supplement (doi:10.3390/ijms17071076), 2016-07-07
Supplement: s1 [file s1]

# Supplementary Materials: MicroRNA-146a-5p Negatively Regulates Pro-Inflammatory Cytokine Secretion and Cell Activation in Lipopolysaccharide Stimulated Human Hepatic Stellate Cells through Inhibition of Toll-Like Receptor 4 Signaling Pathways

Yuhan Chen, Zhaochong Zeng, Xiaoyun Shen, Zhifeng Wu, Yinying Dong and Jason Chia-Hsien Cheng

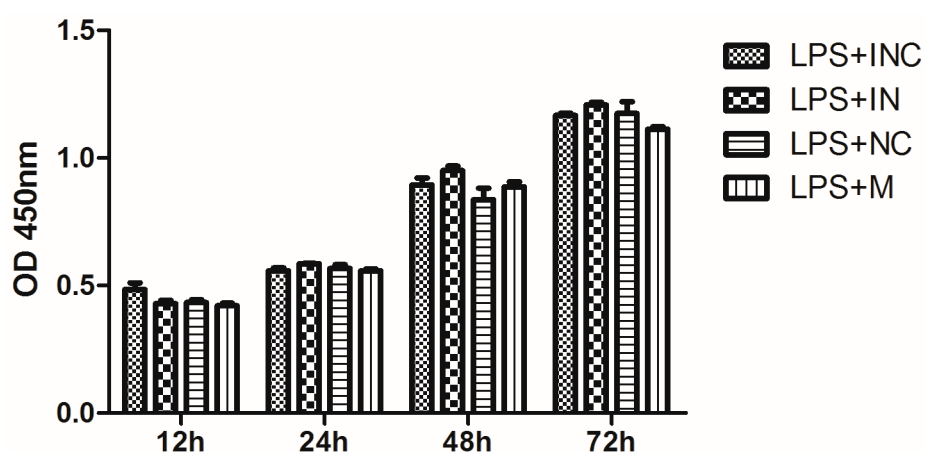

**Figure S1.** miR-146a-5p inhibition or overexpression had no effect on LPS stimulated LX2 cells proliferation. LX2 cells were transfected with miR-146a-5p inhibitor control (INC), miR-146a-5p inhibitor (IN), miR-146a-5p mimic control (NC) or miR-146a-5p mimic (M) and then stimulated with LPS (500 ng/mL) for various times. The proliferation of LX2 cells at each time point was determined by CCK8 assay.
